# Supplementary material for: Chromosome-level genome assembly and population genomic resource to accelerate orphan crop lablab breeding
Source: PubMed Central journal article supplement (PMC10110558; doi:10.1038/s41467-023-37489-7), 2023-04-17
Supplement: 41467_2023_37489_MOESM1_ESM.pdf [file 41467_2023_37489_MOESM1_ESM.pdf]

**Chromosome-level genome assembly and population genomic resource to  
accelerate orphan crop lablab breeding**

Njaci *et al.*

## Supplementary Note 1. Filtering for true-to-type genotypes in historic genebank collection

The lablab accessions used for evaluating global diversity in this study were acquired from different sources and conserved *ex situ* as seeds in the ILRI forage genebank, the earliest since 1982, with periodic monitoring for viability and regeneration for renewal of the seeds. These periodic genebank management practices involve risks to the genetic integrity of the accessions through pollen contamination, seed contamination, segregation, mislabeling, and other factors (e.g. as described in Chebotar *et al.*<sup>1</sup>). Hence, it was necessary to ensure the genetic integrity of plants within accessions and avoid potential contaminants before the genetic diversity analysis. Using pairwise IBD (Identity-By-Descent) analysis, plants within accessions were classified into “true-to-type”, “progeny”, or “contaminant” based on a  $PI\_HAT^2$  value of above 0.80, between 0.125 and 0.80, or less than 0.125, respectively. Six accessions with a single plant each were excluded from the analysis.

For eight accessions, all plants were unrelated to each other, and therefore considered “contaminants”. Out of the remaining 195 accessions, 124 were 100% true-to-type, indicating that there was no cross-pollination or seed mixing. Twenty-six accessions had a mixture of true-to-type and their progeny, indicating that some level of cross-pollination or segregation had taken place in this group. Another 25 accessions had a mixture of true-to-type and contaminants, and other 20 accessions had a mixture of the true-to-type, their progenies, and contaminants (Supplementary Figure 12). After removing contaminants and accessions whose clustering did not match previously obtained phenotype and/or molecular data, a total of 1552 plants from 191 accessions were retained. From the multiple plants per accession, one true-to-type individual plant with the least missing value was selected and used in genetic diversity and genome-wide association studies.

**Supplementary Table 1. Summary of Nanopore reads statistics.**

| <b>Sequencing metric</b>  | <b>Value</b> |
|---------------------------|--------------|
| Number of reads           | 4,678,100    |
| Mean read length (bp)     | 6,071        |
| Median read length (bp)   | 2,119        |
| N50 (bp)                  | 18,828       |
| N75 (bp)                  | 6,702        |
| L50                       | 386          |
| L75                       | 1,019,375    |
| Longest read length (bp)  | 292,841      |
| Shortest read length (bp) | 76           |
| No of runs                | 4            |

**Supplementary Table 2. Comparison of assembly statistics for the lablab genome based on short reads and long reads.**

| <b>Assembly metric</b>       | <b>Short read assembly<sup>3</sup></b> | <b>Long read assembly (this study)</b> |
|------------------------------|----------------------------------------|----------------------------------------|
| Number of contigs/scaffolds  | 118,976                                | 11                                     |
| Total assembly length (bp)   | 395,472,305                            | 417,870,439                            |
| N50 (bp)                     | 621,673                                | 38,128,793                             |
| L50                          | 138                                    | 5                                      |
| N75 (bp)                     | 125,391                                | 32,207,972                             |
| L75                          | 491                                    | 8                                      |
| Longest contig/scaffold (bp) | 5,699,750                              | 63,374,807                             |

**Supplementary Table 3. Summary statistics of genes identified in the lablab genome.**

| <b>Annotation metric</b>             | <b>All genes</b> | <b>Non-TE protein-coding genes</b> |
|--------------------------------------|------------------|------------------------------------|
| Number of genes                      | 30,992           | 24,972                             |
| Number of transcripts                | 79,512           | 67,918                             |
| Number of CDS                        | 79,512           | 67,918                             |
| Number of exons                      | 473,986          | 450,920                            |
| Number of five prime UTRs            | 43,406           | 37,089                             |
| Number of three prime UTRs           | 45,371           | 36,674                             |
| Number of single exon<br>Transcripts | 14,225           | 8,132                              |
| Mean transcripts per gene            | 2.57             | 2.72                               |
| Mean exons per transcript            | 5.96             | 6.64                               |
| Mean gene length (bp)                | 4,136            | 4,627                              |
| Mean transcript length (bp)          | 4,175            | 4,574                              |
| Mean CDS length (bp)                 | 1198.41          | 1317.7                             |
| Mean exon length (bp)                | 273.48           | 256                                |

**Supplementary Table 4. The number of TEs, TE families and the proportion of occupied assembly length by different classes of repeats identified and annotated in the lablab genome.**

| <b>Class</b> | <b>Order</b>        | <b>Superfamily</b> | <b>Number of TEs</b> | <b>Number of Families</b> | <b>Total %</b> |
|--------------|---------------------|--------------------|----------------------|---------------------------|----------------|
| Class I      | LTR-RT              | Copia              | 48,310               | 754                       | 13.22          |
|              |                     | Gypsy              | 19,746               | 185                       | 4.72           |
|              |                     | unknown            | 17,093               | 128                       | 1.97           |
|              | LINE                | unknown            | 396                  | 5                         | 0.03           |
| Class II     | TIR                 | CACTA              | 21,891               | 555                       | 2.86           |
|              |                     | hAT                | 15,632               | 264                       | 1.65           |
|              |                     | MUDR-Mutator       | 16,599               | 245                       | 1.33           |
|              |                     | PIF-Harbinger      | 814                  | 23                        | 0.06           |
|              |                     | Tc1-Mariner        | 3,083                | 22                        | 0.26           |
|              | MITE                | CACTA              | 85                   | 14                        | 0.00           |
|              |                     | hAT                | 878                  | 49                        | 0.06           |
|              |                     | MUDR-Mutator       | 7,276                | 50                        | 0.47           |
|              |                     | PIF-Harbinger      | 286                  | 6                         | 0.01           |
|              |                     | Tc1-Mariner        | 440                  | 10                        | 0.01           |
| Helitron     | Helitron            | 15,645             | 43                   | 1.47                      |                |
| Other        | Unclassified repeat |                    | 100,741              | 927                       | 15.24          |
| <b>Total</b> |                     |                    | <b>268,915</b>       | <b>3,280</b>              | <b>43.36</b>   |

**Supplementary Table 5. Types, amount and proportion of tandem repeats in the lablab genome.**

| <b>Tandem repeats</b>      | <b>Numbers</b> | <b>% of assembly</b> |
|----------------------------|----------------|----------------------|
| Microsatellite ( 2- 9 bp)  | 25,114         | 0.7                  |
| Minisatellites (10 -99 bp) | 109,555        | 3.1                  |
| Satellites (>= 100 bp)     | 7,633          | 7.4                  |
| Total                      | 142,302        | 11.2                 |

**Supplementary Table 6. Pairwise fixation index (Fst) among the seven major clusters (C) detected by the STRUCTURE analysis.**

| <b>Clusters</b>    | <b>Cluster I</b> | <b>Cluster II</b> | <b>Cluster III</b> | <b>Cluster IV</b> | <b>Cluster V</b> | <b>Cluster VI</b> | <b>Cluster VII</b> |
|--------------------|------------------|-------------------|--------------------|-------------------|------------------|-------------------|--------------------|
| <b>Cluster I</b>   |                  |                   |                    |                   |                  |                   |                    |
| <b>Cluster II</b>  | 0.97             |                   |                    |                   |                  |                   |                    |
| <b>Cluster III</b> | 0.89             | 0.67              |                    |                   |                  |                   |                    |
| <b>Cluster IV</b>  | 0.89             | 0.68              | 0.31               |                   |                  |                   |                    |
| <b>Cluster V</b>   | 0.73             | 0.94              | 0.85               | 0.86              |                  |                   |                    |
| <b>Cluster VI</b>  | 0.88             | 0.87              | 0.46               | 0.39              | 0.92             |                   |                    |
| <b>Cluster VII</b> | 0.88             | 0.88              | 0.52               | 0.54              | 0.93             | 0.76              |                    |



**Supplementary Table 7. AMOVA showing the genetic variance among and within clusters.**

| <b>Source of variation</b> | <b>Degrees of freedom (df)</b> | <b>Sum of squares</b> | <b>Mean sum of squares</b> | <b>Percentage of variation</b> | <b>P-value</b> |
|----------------------------|--------------------------------|-----------------------|----------------------------|--------------------------------|----------------|
| Among clusters             | 6                              | 277501.84             | 46250.306                  | 81.04                          | 0.001          |
| Within clusters            | 155                            | 76635.88              | 494.425                    | 18.96                          | 0.001          |

**Supplementary Table 8. Minimum, maximum and average genetic divergence (Nei's D) between accessions within the seven clusters identified by STRUCTURE.**

| <b>Clusters</b> | <b>Min.</b> | <b>Accessions</b>             | <b>Max.</b> | <b>Accessions</b>             | <b>Average</b> |
|-----------------|-------------|-------------------------------|-------------|-------------------------------|----------------|
| I               | 0.00437     | ILRI_21083-M and ILRI_24796-M | 0.40371     | ILRI_13704-7 and ILRI_24800-M | 0.185811       |
| II              | 0.00035     | ILRI_14430-2 and ILRI_14448-3 | 0.01808     | ILRI_6930-10 and ILRI_14422-4 | 0.001903       |
| III             | 0.00171     | ILRI_13689-6 and ILRI_13699-2 | 0.06520     | ILRI_18626-2 and ILRI_21049-M | 0.042810       |
| IV              | 0.00061     | ILRI_14417-2 and ILRI_14456-3 | 0.06182     | ILRI_21068-2 and ILRI_14483-3 | 0.035631       |
| V               | 0.0135      | ILRI_21081-3 and ILRI_24778-4 | 0.07977     | ILRI_21048-5 and ILRI_24750.M | 0.036293       |
| VI              | 0.00058     | ILRI_14435-3 and ILRI_14476-4 | 0.04062     | ILRI_18593-7 and ILRI_14463-2 | 0.013194       |
| VII             | 0.00052     | ILRI_7379-6 and ILRI_14468-4  | 0.02218     | ILRI_18603-5 and ILRI_18627-5 | 0.008637       |

**Supplementary Table 9. Results of the analysis of variance (one-tailed) test for 14 quantitative traits among the six genetic clusters.**

| <b>Trait</b>                    | <b>Abbreviation</b> | <b>N</b> | <b>Df</b> | <b>Sum_sq</b> | <b>Mean_sq</b> | <b>F-value</b> | <b>P-value</b> | <b>Unit</b>                | <b>Further explanations</b>                                              |
|---------------------------------|---------------------|----------|-----------|---------------|----------------|----------------|----------------|----------------------------|--------------------------------------------------------------------------|
| Time to flowering (50%)         | d50fl               | 125      | 5         | 32.65         | 6.53           | 9.31           | 1.66E-07       | days                       | At 50% of flowering                                                      |
| Flowering nodes                 | flownd              | 124      | 5         | 334.14        | 66.83          | 18.85          | 9.71E-14       | number                     | Flowering nodes counted per inflorescence; number of nodes on the rachis |
| Flowering node density          | flowndrat           | 92       | 5         | 48.59         | 9.72           | 20.38          | 2.30E-13       | number/cm rachis           | Density of flowering nodes on the rachis (no. nodes/rachis length)       |
| Leaf length                     | leaflgth            | 125      | 5         | 46.40         | 9.28           | 4.65           | 6.50E-04       | cm                         | Length of terminal leaflet at 50% flowering                              |
| Leaf ratio                      | leafrati            | 125      | 5         | 34.10         | 6.82           | 10.15          | 4.09E-08       | ratio<br>leaflgth/leafwdth | Leaflet length/leaf width                                                |
| Leaf width                      | leafwdth            | 125      | 5         | 74.38         | 14.88          | 8.91           | 3.27E-07       | cm                         | Width of terminal leaflet at 50% flowering                               |
| Peduncle length                 | peduncle            | 124      | 5         | 8002.74       | 1600.55        | 20.69          | 8.62E-15       | cm                         | Length from branch to the first (bottom) flowering node                  |
| Plant height                    | plantht             | 118      | 5         | 35.31         | 7.06           | 13.23          | 3.98E-10       | cm                         | At 100% of flowering                                                     |
| Pod length                      | podlgth             | 125      | 5         | 55.52         | 11.10          | 21.14          | 4.43E-15       | cm                         | Length of fully developed pod prior to maturity                          |
| Pod ratio                       | podrati             | 125      | 5         | 66.86         | 13.37          | 32.77          | 6.81E-21       | ratio<br>podlgth/podwdth   | Pod length/pod width                                                     |
| Pod width                       | podwdth             | 125      | 5         | 20.49         | 4.10           | 5.40           | 1.65E-04       | cm                         | Width of fully developed pod prior to maturity                           |
| Average number of seeds per pod | seed_pod            | 125      | 5         | 62.08         | 12.42          | 36.14          | 2.29E-22       | number                     | Seeds counted per fully developed pod prior to maturity                  |
| Seed mass (1000 seeds)          | seedwt              | 125      | 5         | 34.09         | 6.82           | 10.27          | 3.34E-08       | g/1000 seeds               | Weight of g/1000 seeds                                                   |
| Seed yield                      | seedyld             | 88       | 5         | 32.43         | 6.49           | 9.80           | 2.28E-07       | g/plant                    | At maturity                                                              |

**Supplementary Table 10. Results of the  $\chi^2$  (one-tailed) test for seven qualitative traits among the six genetic clusters.**

| Trait              | Abbreviation | N   | $\chi^2$ | Df | P-value | Unit                                                                                | Further explanations            |
|--------------------|--------------|-----|----------|----|---------|-------------------------------------------------------------------------------------|---------------------------------|
| Flower colour      | flowcol      | 125 | 58.286   | 5  | 0.00050 | rating: 1 = white, 2 = coloured                                                     | At 50% of flowering             |
| Plant growth habit | habit        | 92  | 72.951   | 5  | 0.00050 | rating: 1 = erect, 2 = decumbent/ semi-erect, 3 = prostrate                         | At 2 months after establishment |
| Leafiness          | leafines     | 92  | 23.396   | 5  | 0.28240 | rating: 1 = low to 5 = high                                                         | Rating of leaf to stem ratio    |
| Plant width        | plantwth     | 92  | 25.700   | 5  | 0.01149 | rating: 1 = narrow to 5 = wide                                                      | At 100% of flowering            |
| Seed colour        | seedcol      | 125 | 150.04   | 5  | 0.00050 | rating: 1 = white/cream; 2 = grey; 3 = tan; 4 = redbrown; 5 = dark-brown; 6 = black |                                 |
| Seed mottling      | seedmott     | 92  | 36.595   | 5  | 0.00050 | rating: 1 = no; 2 = yes                                                             |                                 |
| Stem colour        | stemcol      | 125 | 21.495   | 5  | 0.00150 | rating: 1 = green; 2 = coloured                                                     | At 50% of flowering             |

**Supplementary Table 11. Markers Trait Association summary from GWAS analysis.**

| Trait                   | Marker                     | Type       | Chr  | Position | MAF  | FDR_adjusted P-value |          |          |          |          | R <sup>2</sup> | effect |
|-------------------------|----------------------------|------------|------|----------|------|----------------------|----------|----------|----------|----------|----------------|--------|
|                         |                            |            |      |          |      | GLM                  | MLM      | MLMM     | FarmCPU  | BLINK    |                |        |
| Leaf length             | 42196183 F 0-35:A>G-35:A>G | SNP        | Lp08 | 24038488 | 0.10 | 3.41E-03             | -        | 1.30E-02 | 5.87E-03 | 5.12E-05 | 0.18           | 1.33   |
|                         | 42188186                   | SilicoDArT | Lp10 | 4707747  | 0.29 | 3.41E-03             | -        | -        | 2.31E-02 | 4.58E-03 | 0.19           | -0.88  |
| Leaf width              | 42196183 F 0-35:A>G-35:A>G | SNP        | Lp08 | 24038488 | 0.10 | 1.31E-02             | 6.18E-02 | 3.02E-03 | 4.28E-03 | 6.31E-06 | 0.13           | 0.99   |
| Leaf length-width ratio | 42205202 F 0-43:C>T-43:C>T | SNP        | Lp02 | 7611526  | 0.07 | 7.87E-04             | -        | -        | 6.48E-04 | -        | 0.20           | -0.90  |
|                         | 42196183 F 0-35:A>G-35:A>G | SNP        | Lp08 | 24038488 | 0.10 | 4.19E-04             | -        | -        | 6.48E-04 | -        | 0.18           | 0.87   |
| Plant height            | 42187666                   | SilicoDArT | Lp03 | 47543687 | 0.40 | 5.30E-04             | -        | 5.80E-04 | 1.50E-02 | -        | 0.17           | -0.46  |
|                         | 42201040                   | SilicoDArT | Lp04 | 30542557 | 0.23 | 4.19E-03             | -        | 3.07E-02 | 5.67E-03 | 1.88E-03 | 0.10           | -0.40  |
| Days to 50% flowering   | 70185130                   | SilicoDArT | Lp03 | 48868491 | 0.39 | 1.46E-04             | -        | -        | -        | 7.43E-04 | 0.24           | -0.55  |
|                         | 42199202 F 0-56:G>C-56:G>C | SNP        | Lp03 | 9993233  | 0.13 | 1.46E-04             | -        | -        | -        | 4.61E-03 | 0.22           | 0.72   |
| Pod length              | 42200209 F 0-23:G>T-23:G>T | SNP        | Lp06 | 12569256 | 0.39 | 1.10E-02             | -        | -        | -        | 6.92E-05 | 0.12           | -0.57  |
| Pod width               | 42194684                   | SilicoDArT | Lp04 | 6221408  | 0.46 | 4.61E-03             | -        | -        | 7.62E-03 | -        | 0.17           | -0.63  |
|                         | 42206028                   | SilicoDArT | Lp05 | 22796506 | 0.22 | 4.61E-03             | -        | -        | 1.40E-02 | 2.35E-03 | 0.17           | 0.60   |
|                         | 42213627                   | SilicoDArT | Lp06 | 26336574 | 0.30 | 7.38E-03             | -        | -        | -        | 1.75E-05 | 0.15           | -0.61  |
| Pod length-width ratio  | 42195069                   | SilicoDArT | Lp03 | 3183668  | 0.30 | 8.40E-03             | -        | -        | -        | 9.89E-05 | 0.11           | -0.91  |
|                         | 42200824 F 0-21:T>C-21:T>C | SNP        | Lp06 | 24304350 | 0.15 | -                    | -        | 1.78E-03 | 4.40E-03 | 5.19E-08 | 0.10           | 0.45   |
|                         | 71243085                   | SilicoDArT | Lp06 | 2531646  | 0.12 | -                    | -        | -        | 7.13E-05 | 1.15E-06 | 0.07           | 0.33   |
|                         | 42207435                   | SilicoDArT | Lp07 | 5711942  | 0.22 | 2.68E-03             | 3.32E-02 | 6.97E-12 | 1.10E-06 | 2.49E-09 | 0.13           | 0.68   |
| Thousand seeds weight   | 42205053 F 0-8:G>C-8:G>C   | SNP        | Lp07 | 35806317 | 0.08 | 4.21E-03             | -        | 6.65E-04 | -        | 1.64E-02 | 0.15           | -0.75  |

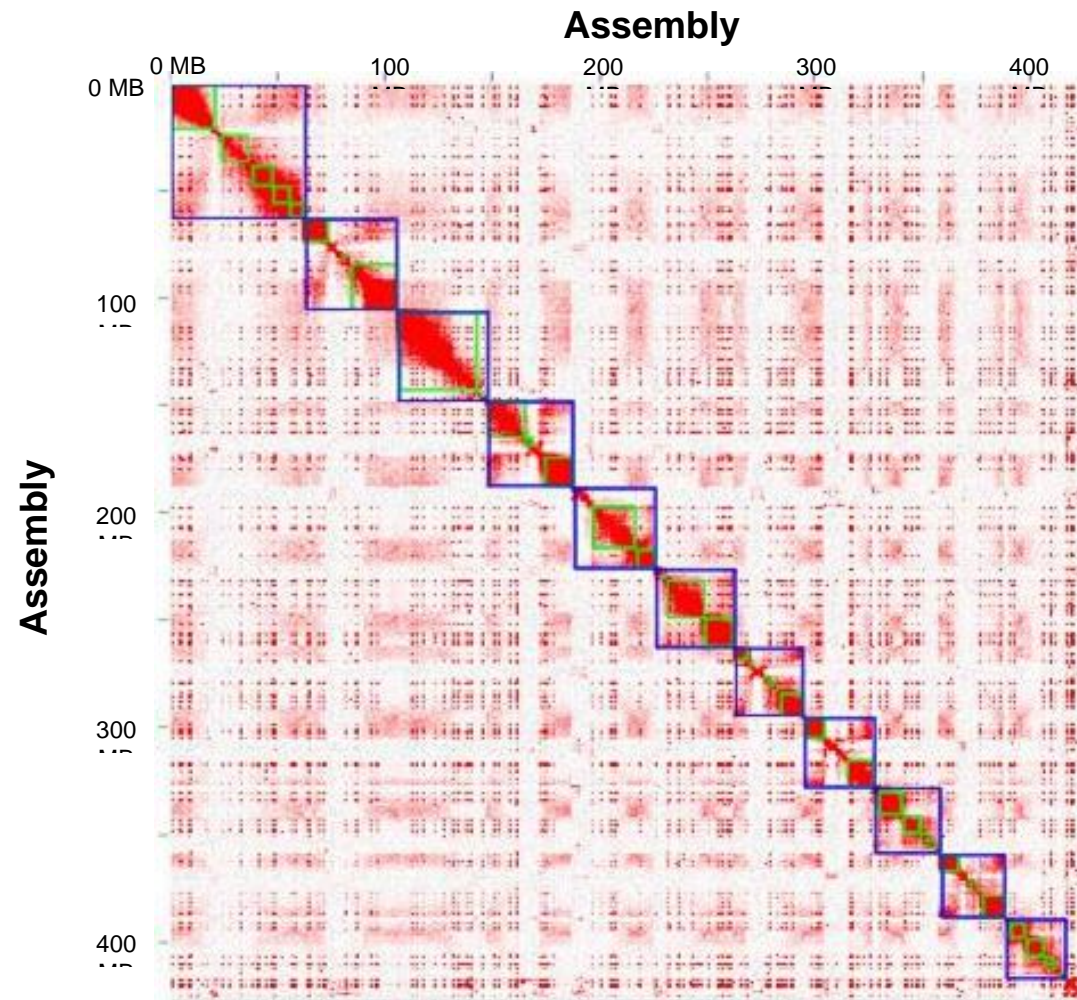

**Supplementary Figure 1. Hi-C Scaffolding of the lablab genome.** Hi-C contact map used for scaffolding the lablab assembly contigs to 11 chromosome. The blue boxes highlight the chromosomes while the green boxes highlight the contigs.

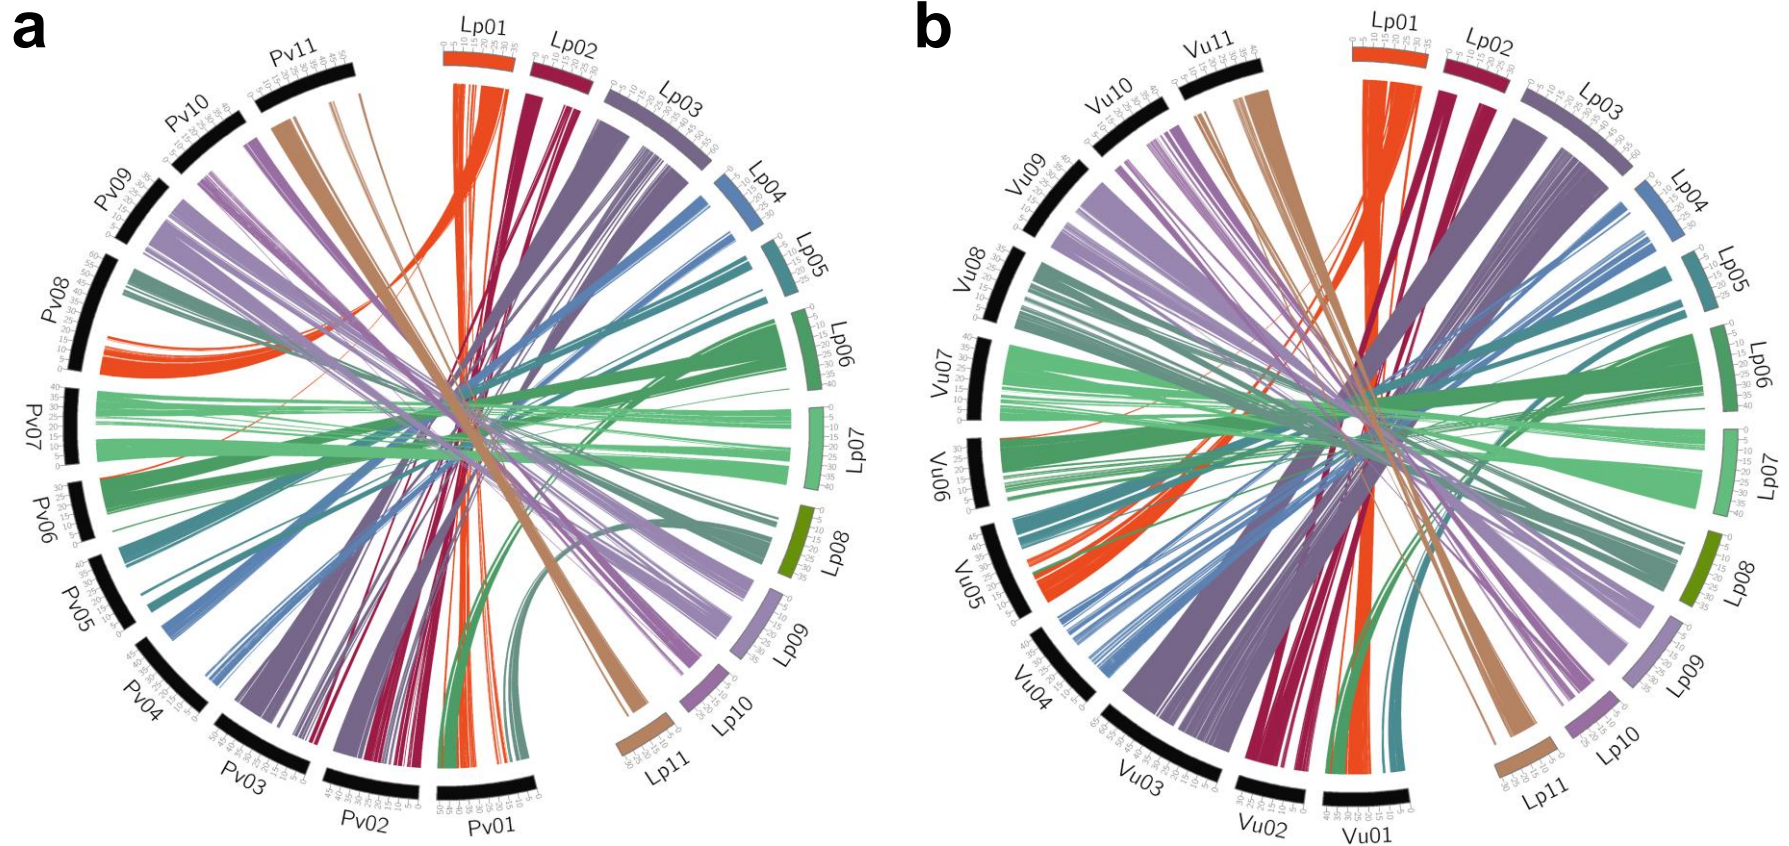

**Supplementary Figure 2. Chromosome-level synteny of *Lablab purpureus* with related species.** *L. purpureus* chromosomes have been named according to synteny with *P. vulgaris* (a) and *V. unguiculata* (b) chromosomes.

**a**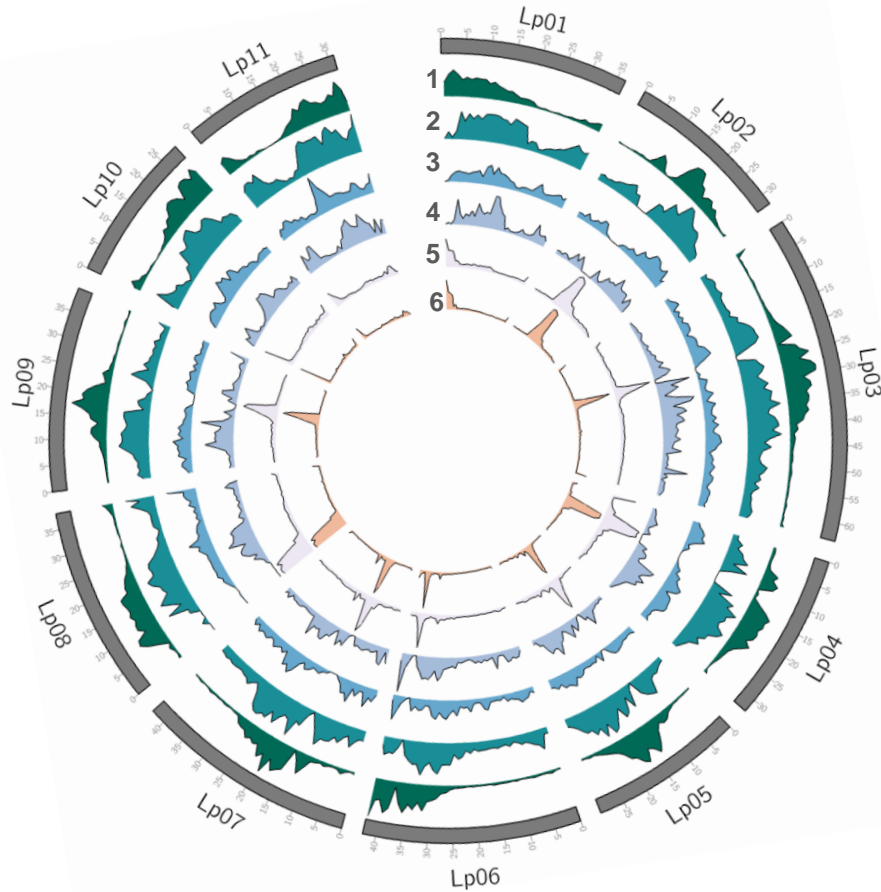**b**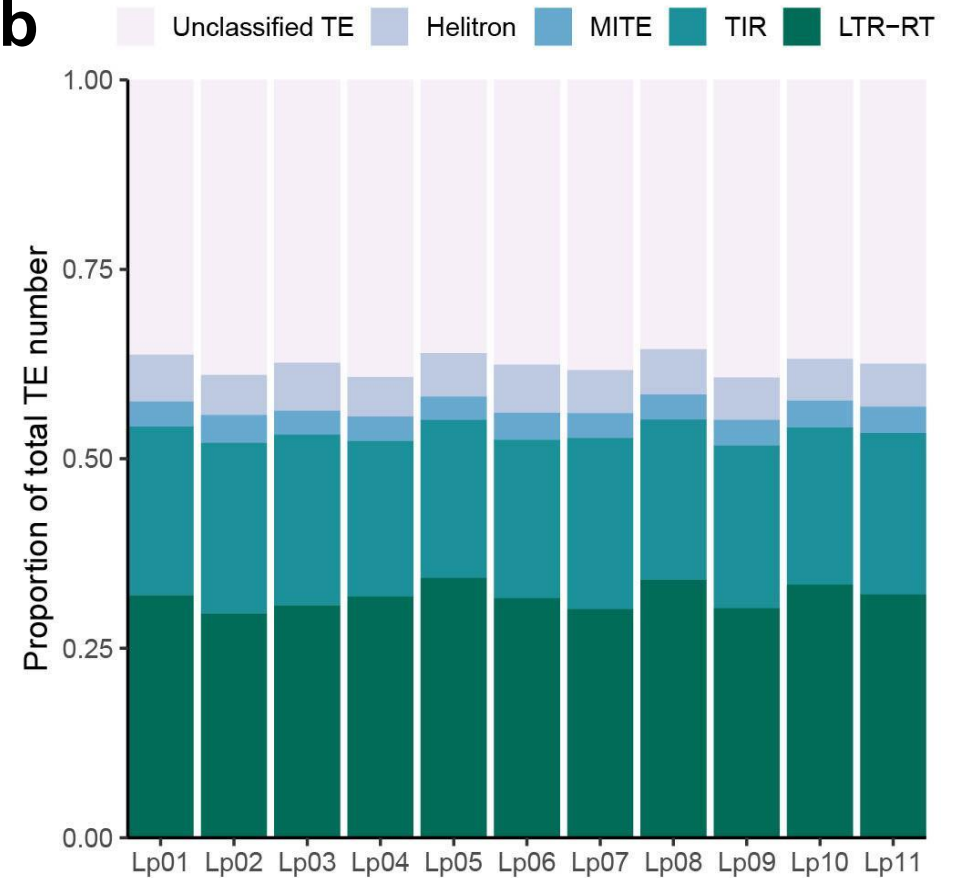

**Supplementary Figure 3. Chromosomal repeat content in *Lablab purpureus*.** (a) Relative densities of repeat elements along each chromosome. 1) Long Terminal Repeat RetroTransposons (LTR-RT), 2) Tandem Inverted Repeats (TIR), 3) Miniature Inverted Transposable Elements (MITE), 4) Helitron 5) Unclassified repeats, 6) Tandem repeats (b) Proportional abundance of identified transposable element orders on each chromosome. Source data are provided as a Source Data file.



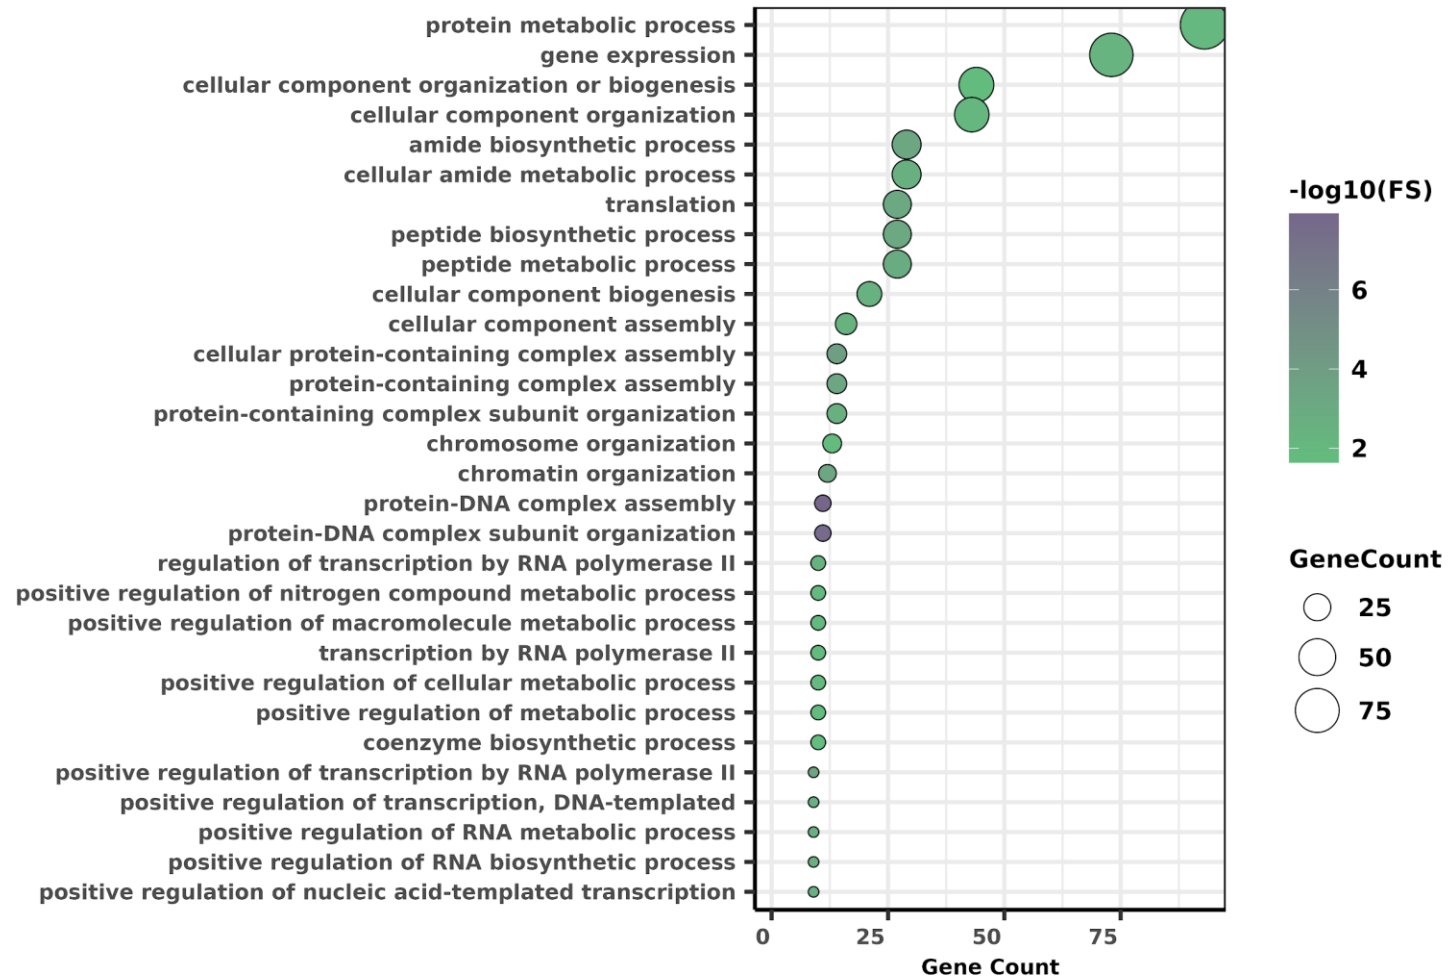

**Supplementary Figure 4. Contracted gene families in lablab.** Gene ontology terms enriched in the set of contracted gene families in lablab are indicated with size of the bubble proportional to the number of genes in that GO term. Source data are provided as a Source Data file.

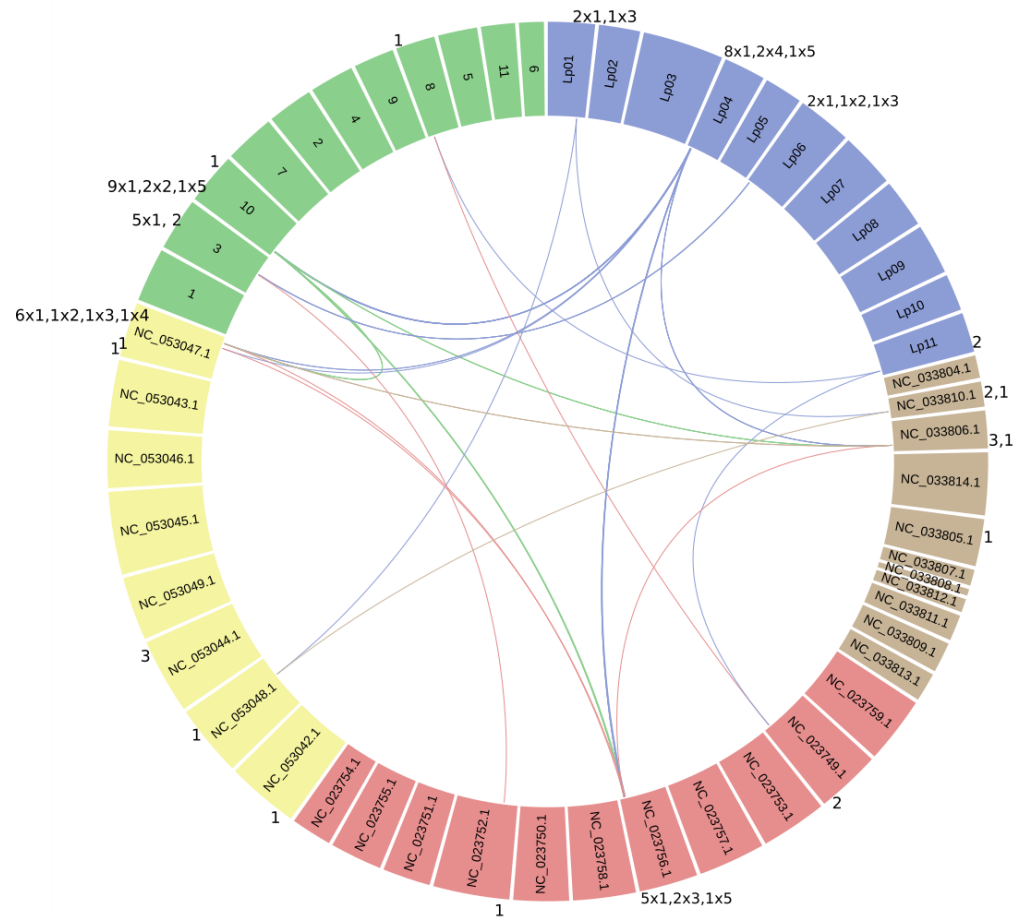

**Supplementary Figure 5. Collinear relationship between trypsin inhibitor encoding genes** in the genomes of lablab (purple), *Vigna angularis* (green) *Cajanus cajan* (brown), *Phaseolus vulgaris* (pink) and *Medicago truncatula* (yellow) are shown with connections in the middle. The number of trypsin inhibitor encoding genes or the length of the tandem array are indicated in the outer track.

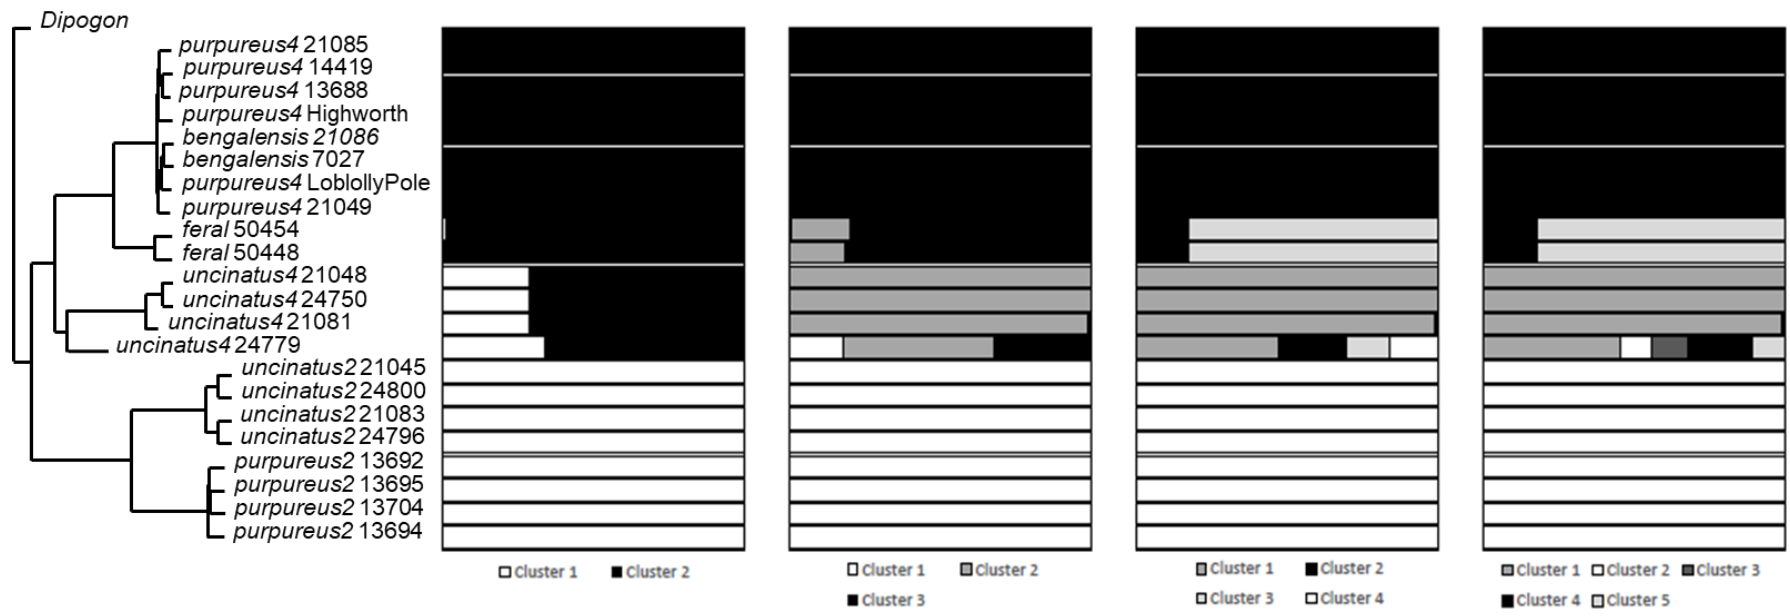

**Supplementary Figure 6. STRUCTURE analysis varying the number of clusters from 2 to 5 (left to right).** Individuals and relationships are shown on the left. Cluster membership is indicated according to the proportion of each bar in different shades. Source data are provided as a Source Data file.

**a**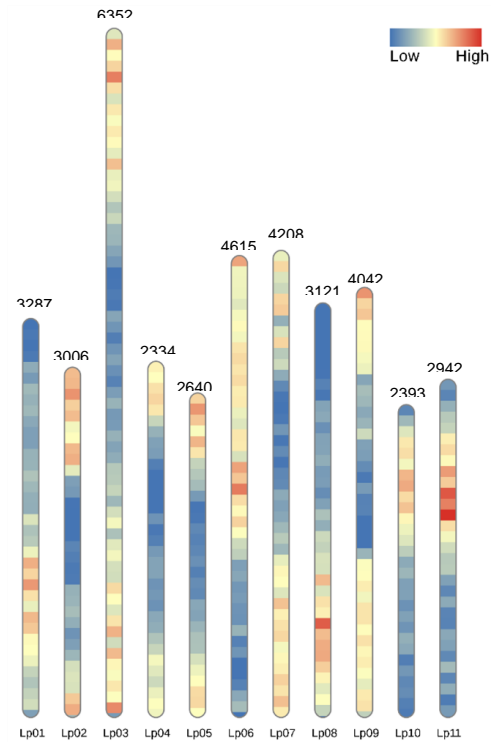**b**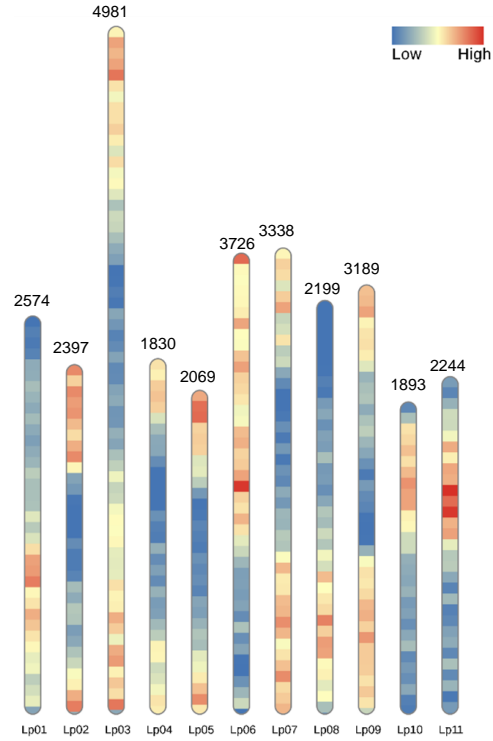

**Supplementary Figure 7. GBS polymorphism in comprehensive lablab collection.** Genome-wide distribution of SNPs (**a**) and SilicoDArTs (**b**) markers in 1 Mbp bins across the eleven chromosomes of the lablab reference genome. The total number of SNPs or SilicoDArT markers are presented above each chromosome. Source data are provided as a Source Data file.

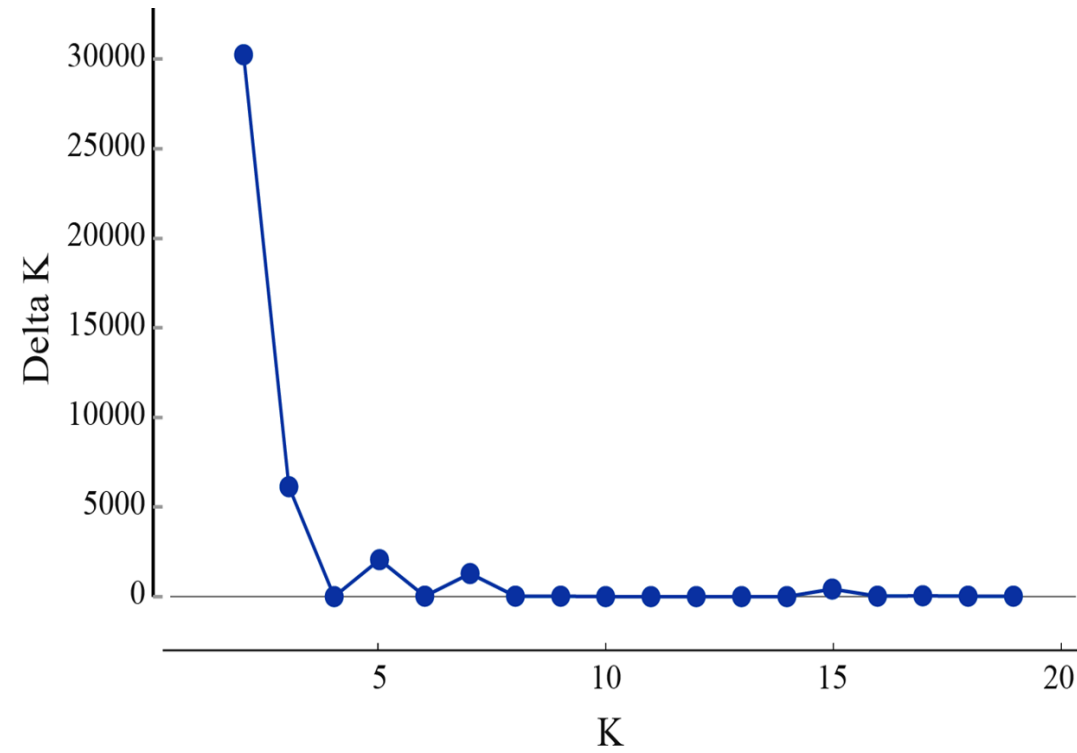

**Supplementary Figure 8.** The delta K suggesting two major groups and seven subgroups detected by the admixture model in STRUCTURE analysis. Source data are provided as a Source Data file.

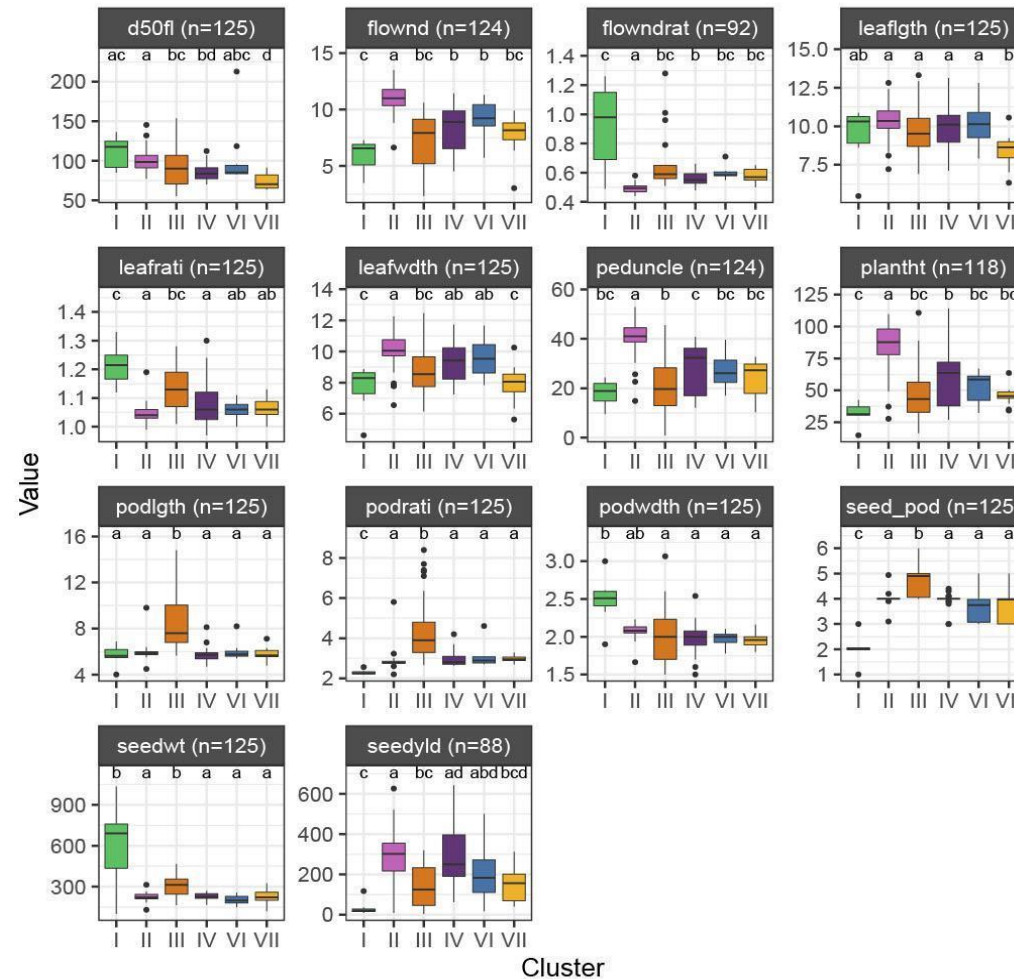

**Supplementary Figure 9. Quantitative phenotypic variation in a comprehensive lablab collection.** Boxplots showing phenotypic variation of different morpho-agronomic quantitative traits among the genetic clusters identified in lablab. The colours are according to the STRUCTURE analysis with  $k = 7$ , and trait abbreviations are explained in Table S14. The total number of accessions in each plot is indicated in parenthesis in the title. Colored boxes represent interquartile range (IQR) with the first and third quartiles at the lower and the upper limits, respectively. the black mid-line in each box represent the median and the whisker represent  $1.5 \times \text{IQR}$ . The letters above each box show the TUKEY multiple comparison groupings. Clusters with the same letter are statistically different trait distribution. Source data are provided as a Source Data file.

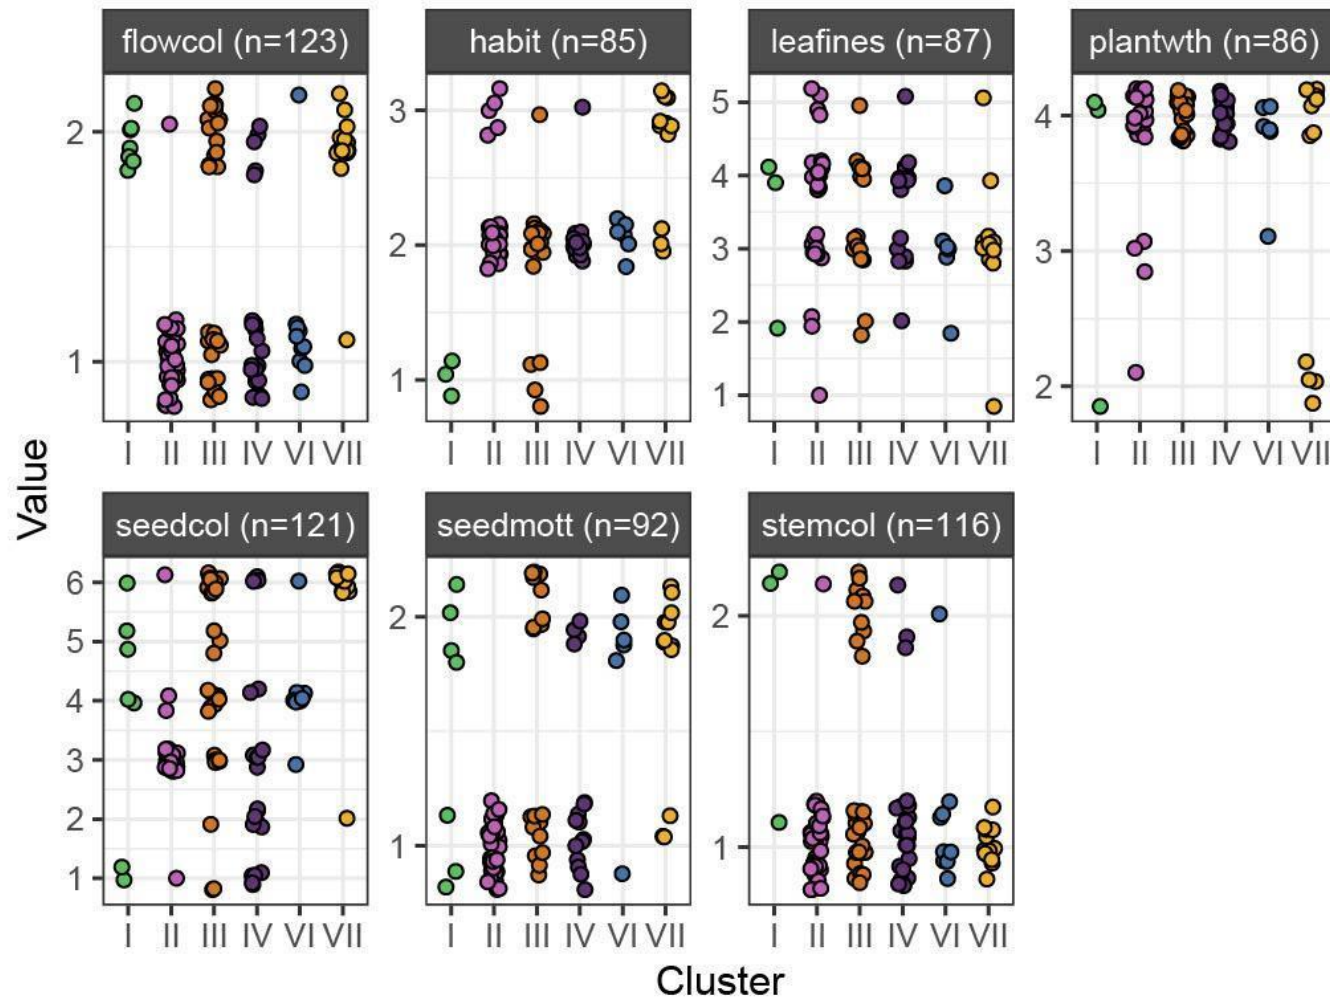

**Supplementary Figure 10. Qualitative phenotypic variation in a comprehensive lablab collection.** Jitter plots showing phenotypic variation of seven qualitative traits among the genetic clusters identified in lablab. The colors are according to the STRUCTURE analysis with  $k = 7$ , and trait abbreviations are explained in Table S15. The total number of accessions in each plot is indicated in parenthesis in the title. Identical categorical data points are randomly scattered on the x and y axis. Source data are provided as a Source Data file.

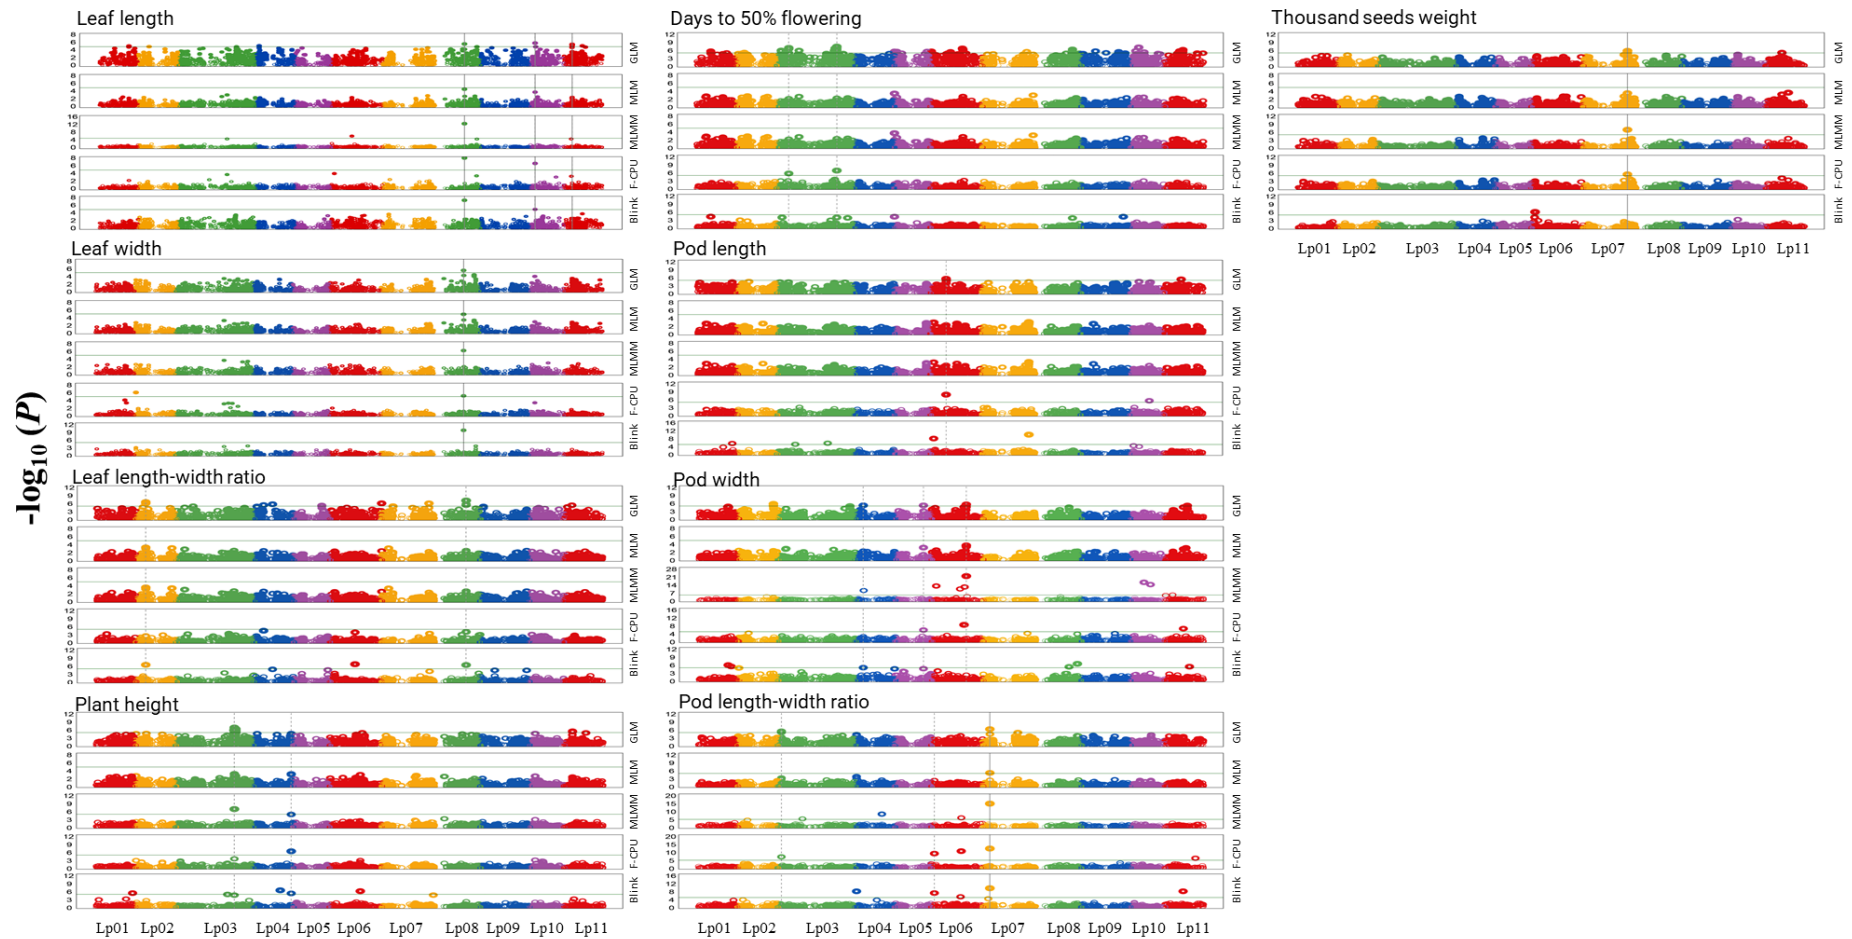

**Supplementary Figure 11.** Manhattan plots showing the distribution of significant marker-trait association (MTA) identified in the lablab genome for nine quantitative traits (Table S16). Vertical axis at the left represents the  $-\log_{10} p$ -value, and markers and their chromosome positions are shown in horizontal axis. The five GAPIT models (Blink, FarmCPU, MLM, MLM, GLM) used are shown at right vertical axis.



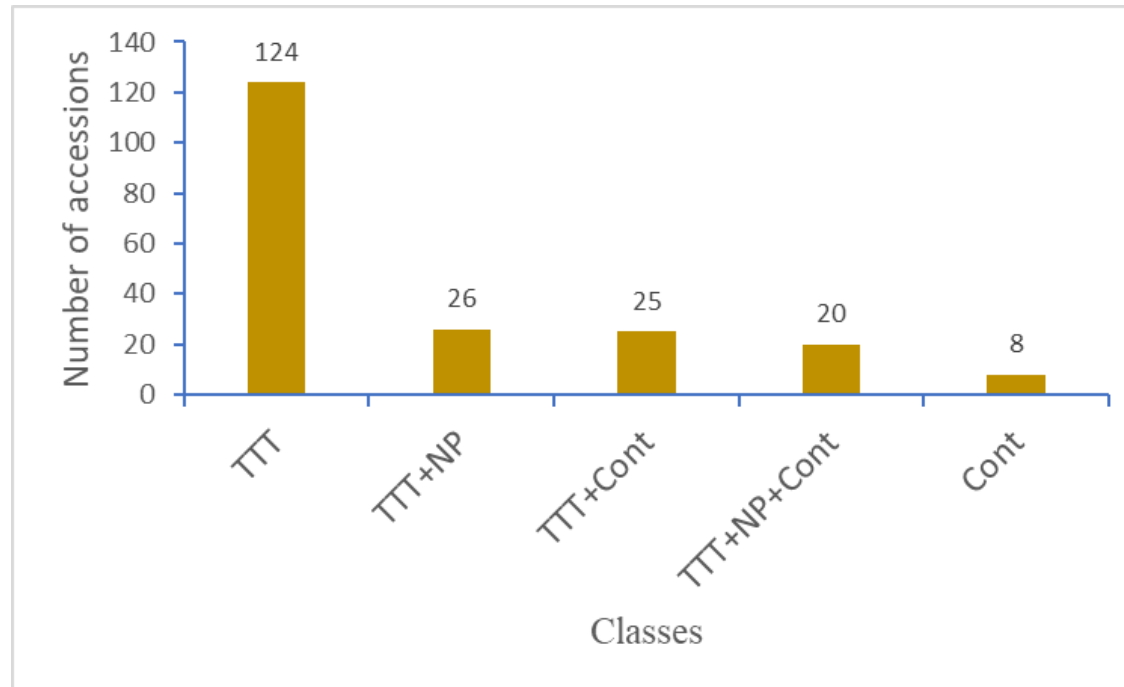

**Supplementary Figure 12. Identity-By-Descent classification of global lablab collection.** Number of accessions classified as true-to-type (TTT), true-to-type and progenies (TTT+NP), true-to-type and contaminants (TTT+Cont), true-to-type and progenies and contaminants (TTT+NP+Cont), and accessions with 100% contaminants (Cont), based on a pairwise Identity-By-Descent (IBD) analysis.

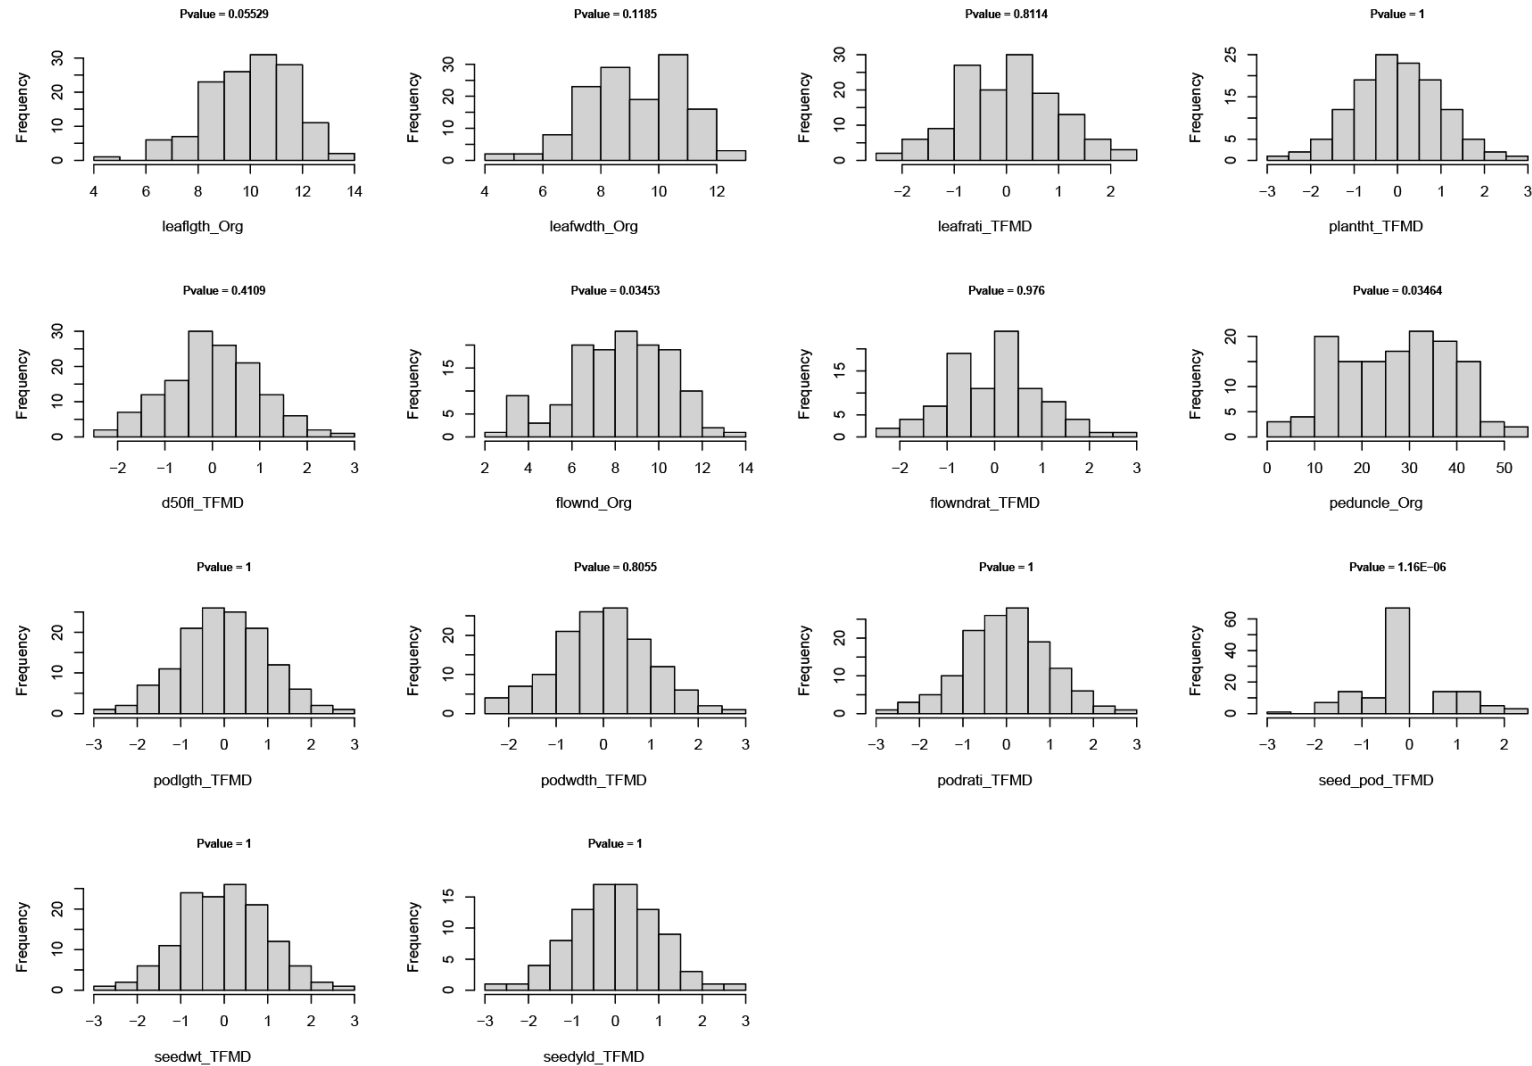

**Supplementary Figure 13. Distribution of the historical phenotype data of quantitative traits.** When a trait's distribution was closer to normal ( $P > 0.01$ ), the original data (org) were used; however, the data were transformed (TFMD) whenever the distribution significantly ( $P < 0.01$ ) deviated from normality. One-tailed Shapiro-Wilk test was used to test for normality.

## Supplementary references

<sup>1</sup>Chebotar, S. *et al.* Molecular studies on genetic integrity of open-pollinating species rye (*Secale cereale* L.) after long-term genebank maintenance. *Theor Appl Genet* **107**, 1469-1476 (2003).

<sup>2</sup>Purcell, S. *et al.* PLINK: A tool set for whole-genome association and population-based linkage analyses. *Am J Hum Genet* **81**, 559–575 (2007).

<sup>3</sup>Chang, Y. *et al.* The draft genomes of five agriculturally important African orphan crops. *Gigascience* **8**, giy152 (2019).
