# Supplementary material for: Chromosome-level genome assembly and population genomic resource to accelerate orphan crop lablab breeding
Source: PubMed Central journal article supplement (PMC10110558; doi:10.1038/s41467-023-37489-7), 2023-04-17
Supplement: 41467_2023_37489_MOESM3_ESM.pdf [file 41467_2023_37489_MOESM3_ESM.pdf]

### **Description of Additional Supplementary Files**

File Name: Supplementary Data 1

Description: Orthogroups in lablab and other legumes

File Name: Supplementary Data 2

Description: GO annotation of lablab-specific gene clusters

File Name: Supplementary Data 3

Description: GO annotation of gene families expanded in lablab

File Name: Supplementary Data 4

Description: Details and sequencing statistics of resequencing samples

File Name: Supplementary Data 5

Description: Lablab accessions genotyped for genetic diversity study
